# Supplementary material for: Preferential Expression of Programmed Death Ligand 1 Protein in Tumor-Associated Macrophages and Its Potential Role in Immunotherapy for Hepatocellular Carcinoma
Source: MDPI journal article supplement (doi:10.3390/ijms22094710), 2021-04-29
Supplement: s1 [file s1]

Supplementary Figure 1

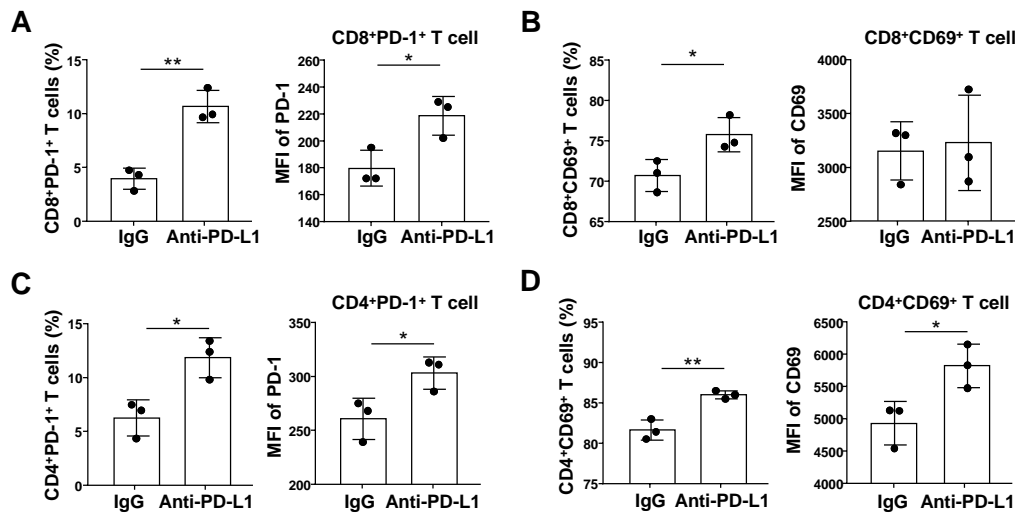

**Supplementary Figure 1. PD-1, CD69 expression on PMA/Ionomycin-activated CD8<sup>+</sup> and CD4<sup>+</sup> T cells increased significantly after PD-L1 blocking in M2 macrophages**  
A. CD8<sup>+</sup> PD1<sup>+</sup> T cells frequency and MFI  
B. CD8<sup>+</sup> CD69<sup>+</sup> T cells frequency and MFI  
C. CD4<sup>+</sup> PD1<sup>+</sup> T cells frequency and MFI  
D. CD4<sup>+</sup> CD69<sup>+</sup> T cells frequency and MFI

Supplementary Figure 2

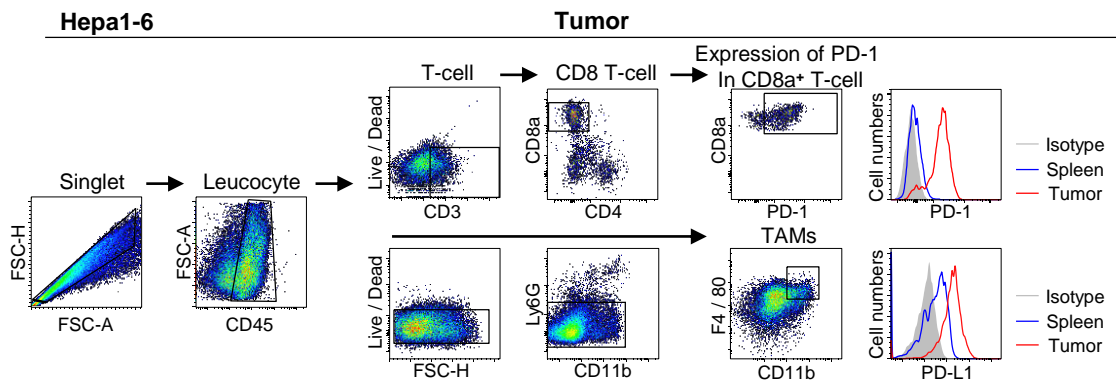

Supplementary Figure 2. Flow cytometry gating strategy in a hepa1-6 syngeneic mouse model.

Supplementary Figure 3

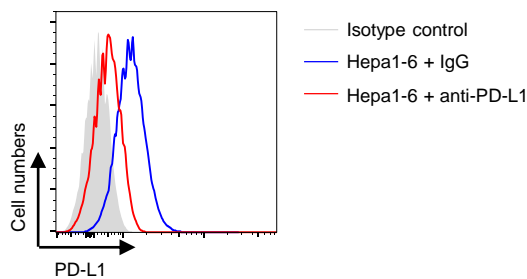

Supplementary Figure 3. PD-L1 expression in Hepa1-6 cells.

**Supplementary Table 1**  
**Antibodies and protein used in this study**

| Antibodies                                 | Clone   | Company     | Dilution                  | Target host  | Application      |
|--------------------------------------------|---------|-------------|---------------------------|--------------|------------------|
| Anti-CD3                                   |         | Abcam       | 1:100                     | Human        | IHC              |
| Anti-CD68                                  | KP1     | Abcam       | 1:1000                    | Human        | IHC              |
| Anti-PD-L1                                 | 22C3    | Dako        | 2µg/ml                    | Human        | IHC              |
| Anti-PD-L1 antibody                        | 29E.2A3 | BioXcell    | 20µg/ml                   | Human        | Blocking         |
| Anti-PD-L1 antibody                        | 10F.9G2 | BioXcell    | 100µg/ml                  | Mouse        | Blocking         |
| Normal mouse IgG                           |         | Santacruz   | 100µg/ml                  | Human        | Blocking control |
| Normal rat IgG2b                           |         | Santacruz   | 100µg/ml                  | Mouse        | Blocking control |
| Live/Dead Fixable aqua Dead Cell Stain Kit |         | Invitrogen  | 1µl/10 <sup>6</sup> cells | Human, Mouse | Flow cytometry   |
| PerCP-Cy5.5-conjugated anti-CD3            | UCHT1   | BD          | 1µl/10 <sup>6</sup> cells | Human        | Flow cytometry   |
| V450-conjugated anti-CD8                   | RPA-T8  | BD          | 1µl/10 <sup>6</sup> cells | Human        | Flow cytometry   |
| APC-H7-conjugated anti-CD4                 | SK3     | BD          | 1µl/10 <sup>6</sup> cells | Human        | Flow cytometry   |
| PE-Cy7-conjugated anti-Ki-67               | B56     | BD          | 1µl/10 <sup>6</sup> cells | Human        | Flow cytometry   |
| APC-conjugated anti-CD69                   | FN50    | BD          | 1µl/10 <sup>6</sup> cells | Human        | Flow cytometry   |
| PE-conjugated anti-PD-1                    | NAT105  | Biolegend   | 1µl/10 <sup>6</sup> cells | Human        | Flow cytometry   |
| PE-Cy7-conjugated anti-Ly6G                | 1A8     | BD          | 1µl/10 <sup>6</sup> cells | Mouse        | Flow cytometry   |
| APC-conjugated anti-PD-L1                  | MIH1    | BD          | 1µl/10 <sup>6</sup> cells | Human        | Flow cytometry   |
| V500-conjugated anti-CD45                  | 30-F11  | BD          | 1µl/10 <sup>6</sup> cells | Mouse        | Flow cytometry   |
| APC-conjugated anti-CD69                   | H1.2F3  | BD          | 1µl/10 <sup>6</sup> cells | Human        | Flow cytometry   |
| V450-conjugated anti-CD11b                 | M1/70   | BD          | 1µl/10 <sup>6</sup> cells | Mouse        | Flow cytometry   |
| BV421-conjugated anti-CD3                  | 17A2    | BD          | 1µl/10 <sup>6</sup> cells | Mouse        | Flow cytometry   |
| APC-Cy7-conjugated anti-F4/80              | BM8     | Biolegend   | 1µl/10 <sup>6</sup> cells | Mouse        | Flow cytometry   |
| V500-conjugated anti-CD3                   | UCHT1   | BD          | 1µl/10 <sup>6</sup> cells | Human        | Flow cytometry   |
| PerCP-Cy5.5-conjugated anti-CD8a           | 53.6.7  | ebioscience | 1µl/10 <sup>6</sup> cells | Mouse        | Flow cytometry   |
| PE-conjugated anti-IFN-γ                   | B27     | BD          | 1µl/10 <sup>6</sup> cells | Human        | Flow cytometry   |
| PE-Cy7-conjugated anti-TNFα                | MAb11   | BD          | 1µl/10 <sup>6</sup> cells | Human        | Flow cytometry   |
| Recombinant human IL-4                     |         | R&D systems | 1µg/ml                    | Human        | M2-polarization  |
| Recombinant human M-CSF                    |         | R&D systems | 1µg/ml                    | Human        | M2-polarization  |
